# Supplementary material for: Nonequilibrium structure formation in electrohydrodynamic emulsions
Source: Royal Society of Chemistry journal article supplement (doi:10.1039/d3sm01110k), 2023-01-01
Supplement: d3sm01110k1.pdf [file d3sm01110k1.pdf]

## Nonequilibrium structure formation in electrohydrodynamic emulsions - Supporting information

Jeremy I. Kach, Lynn M. Walker, and Aditya S. Khair

*Department of Chemical Engineering Carnegie Mellon University*

All videos are shown at a frame rate of 20 frames/second, with each frame capturing a snapshot every  $\Delta t = 5000$ ,  $\tau = 25$ .

**Supplementary video 1:** Three dimensional view of simulation for  $R = 0.2$ ,  $S = 4.9$ , and  $M = 1$ . The electric field points in the vertical direction.

**Supplementary video 2:** Three dimensional view of simulation for  $R = 0.2$ ,  $S = 0.1$ , and  $M = 1$ . The electric field points in the vertical direction.

**Supplementary video 3:** Three dimensional view of simulation for  $R = 0.2$ ,  $S = 16$ , and  $M = 1$ . The electric field points in the vertical direction.

**Supplementary video 4:** Three dimensional view of simulation for  $R = 0.2$ ,  $S = 150$ , and  $M = 1$ . The electric field points in the vertical direction.

**Supplementary video 5:** Simulation of drops confined to the plane perpendicular to the field axis, for  $R_A = R_B = 1$ ,  $S_A = 10$ ,  $S_B = 0.1$ , and  $M_A = M_B = 1$ . The electric field points out of the page. The blue drops are of type  $A$  and the red drops are of type  $B$ .

**Supplementary video 6:** Simulation of drops confined to the plane perpendicular to the field axis, for  $R_A = 10$ ,  $R_B = 0.1$ ,  $S_A = S_B = 1$ , and  $M_A = M_B = 1$ . The electric field points out of the page. The blue drops are of type  $A$  and the red drops are of type  $B$ .

**Supplementary video 5:** Three dimensional view of simulation for  $R_A = 10$ ,  $R_B = 0.1$ ,  $S_A = S_B = 1$ , and  $M_A = M_B = 1$ . The electric field points in the vertical direction. The

blue drops are of type  $A$  and the red drops are of type  $B$ .
